# Supplementary material for: Dapansutrile OLT1177 suppresses foreign body response inflammation while preserving vascularisation of implanted materials
Source: Royal Society of Chemistry journal article supplement (doi:10.1039/d4tb00705k), 2024-01-01
Supplement: d4tb00705k1.zip [file d4tb00705k1.zip]

**Supplemental figures**


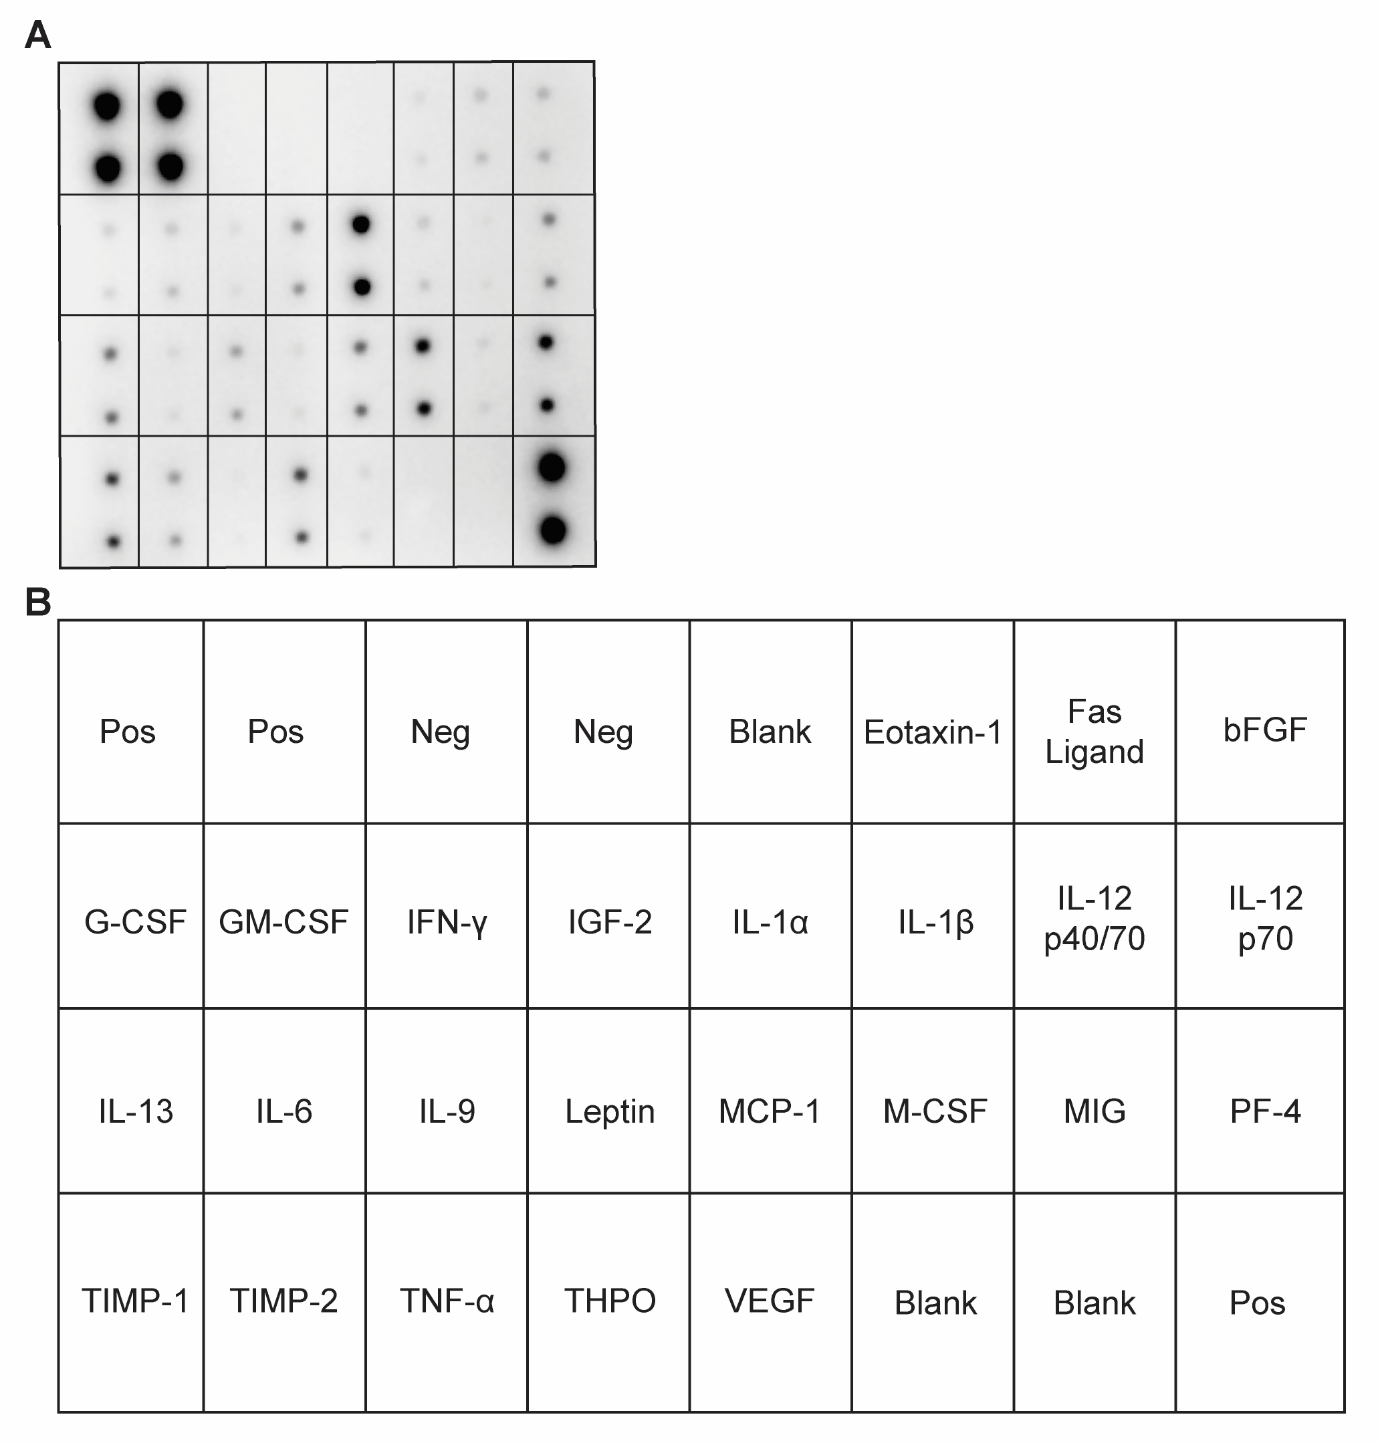


Figure S1: Label of angiogenic array. A) Example array with the pairs of dots segmented. B) Labels of corresponding
